# Supplementary material
Source: MDPI journal article supplement (https://www.mdpi.com/2073-4441/9/4/188)
Supplement: s1 [file s1]

**Table S4.** List of fish species in samples analysed and their Fish Region Index (FRI).

| <b>Scientific name</b>       | <b>FRI*</b> |
|------------------------------|-------------|
| Abramis bjoerkna             | 7.00        |
| Abramis brama                | 7.00        |
| Alburnus alburnus            | 6.58        |
| Anguilla anguilla            | 6.67        |
| Aspius aspius                | 6.75        |
| Barbatula barbatula          | 5.25        |
| Barbus barbus                | 6.08        |
| Carassius carassius          | 6.83        |
| Carassius gibelio            | 6.75        |
| Chondrostoma nasus           | 5.83        |
| Cobitis taenia               | 6.50        |
| Cottus gobio                 | 4.17        |
| Cyprinus carpio              | 6.75        |
| Esox lucius                  | 6.58        |
| Gasterosteus aculeatus       | 7.17        |
| Gasterosteus aculeatus       | 7.17        |
| Gobio gobio                  | 5.83        |
| Gymnocephalus cernuus        | 7.58        |
| Lampetra fluviatilis +       | 5.17        |
| Lampetra planeri             | 4.58        |
| Leucaspis delineatus         | 6.75        |
| Leuciscus cephalus           | 5.83        |
| Leuciscus idus               | 6.83        |
| Leuciscus leuciscus          | 5.75        |
| Lota lota                    | 6.17        |
| Oncorhynchus mykiss          | 4.00        |
| Perca fluviatilis            | 6.92        |
| Phoxinus phoxinus            | 5.00        |
| Pseudorasbora parva          | 6.42        |
| Pungitius pungitius          | 7.17        |
| Rhodeus amarus               | 6.50        |
| Rutilus rutilus              | 6.83        |
| Salmo salar +                | 5.00        |
| Salmo trutta cf. lacustris + | 4.33        |
| Salmo trutta cf. trutta +    | 5.00        |
| Sander lucioperca            | 7.25        |
| Scardinius erythrophthalmus  | 6.92        |
| Silurus glanis               | 6.92        |
| Thymallus thymallus          | 4.92        |
| Tinca tinca                  | 6.92        |

+ Characterisation is valid for occurrence of spawning animals and habitats of juveniles

\*FRI values are provided within the results files of the fish assessment software, or in the respective handbook (in german only)

<http://www.lazbw.de/pb/,Lde/Startseite/Fischereiforschungsstelle/FIBS> (accessed on 28.12.2016)

[http://www.lazbw.de/pb/site/lel/get/documents/MLR.LEL/PB5Documents/lazbw\\_ffs/Handbuch\\_fiBS.pdf](http://www.lazbw.de/pb/site/lel/get/documents/MLR.LEL/PB5Documents/lazbw_ffs/Handbuch_fiBS.pdf) (accessed on 28.12.2016)
