# Supplementary material
Source: MDPI journal article supplement (https://www.mdpi.com/2073-4441/9/4/188)
Supplement: s1 [file s1]

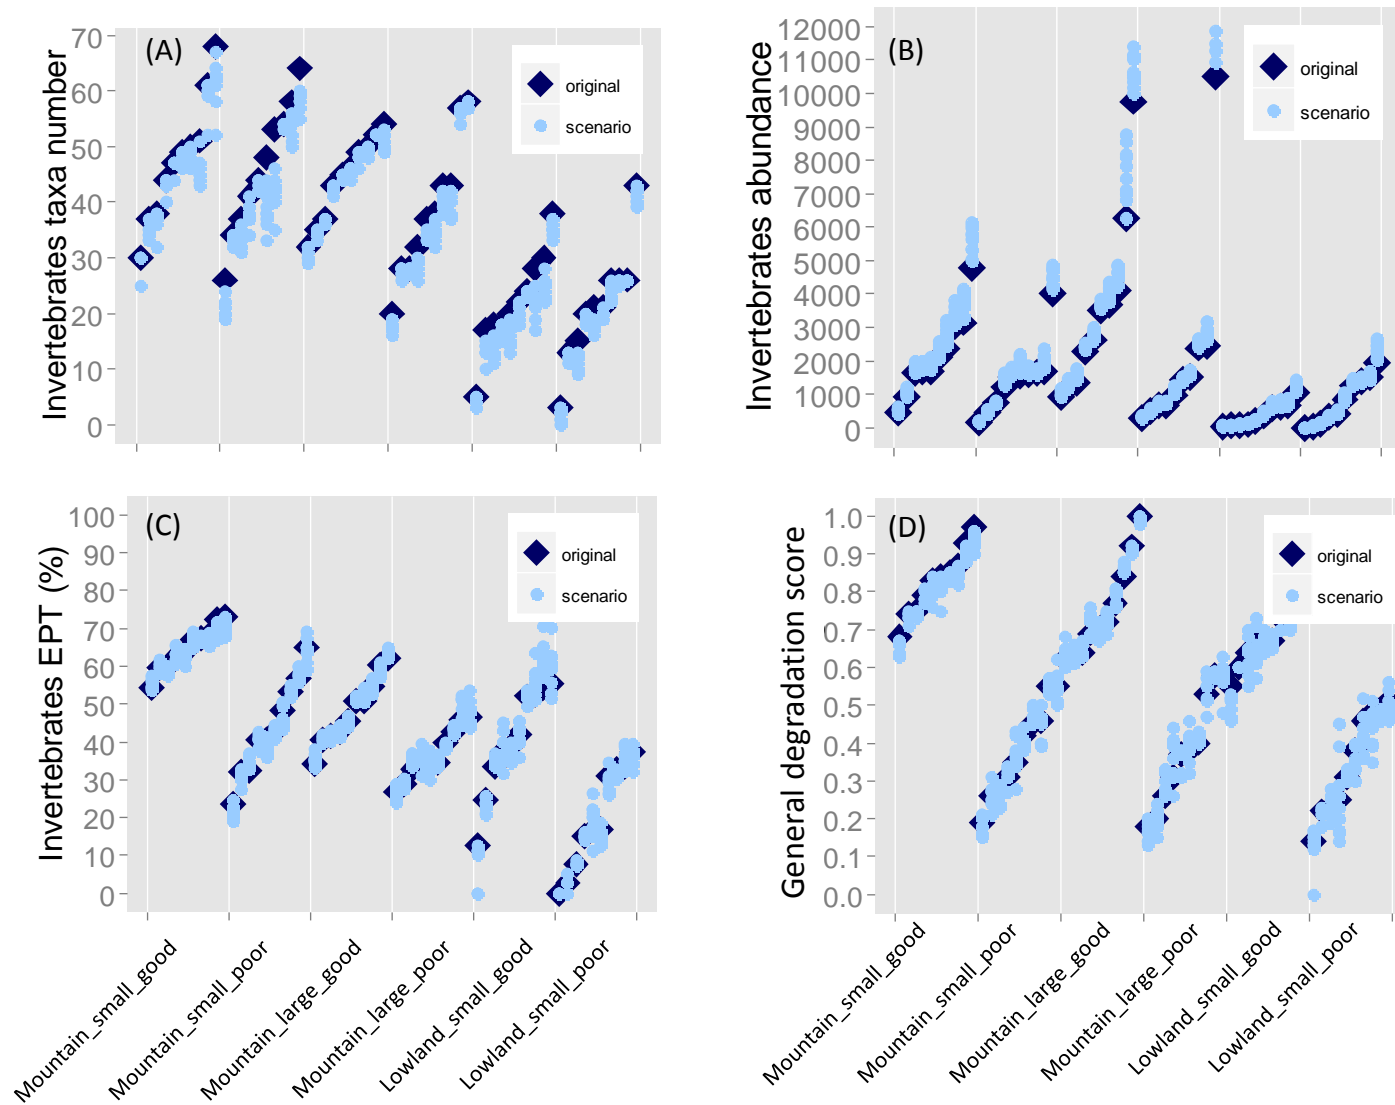

**Figure S1 (A-D).** Values of key metrics for invertebrate communities (taxa number, abundance, proportion EPT, general degradation score) for original and scenario data. Sites are ordered for increasing metric value for each metric, i.e. that point 1 in Fig. S1-A is not necessarily the same sampling site as point 1 in Fig. S1-B.

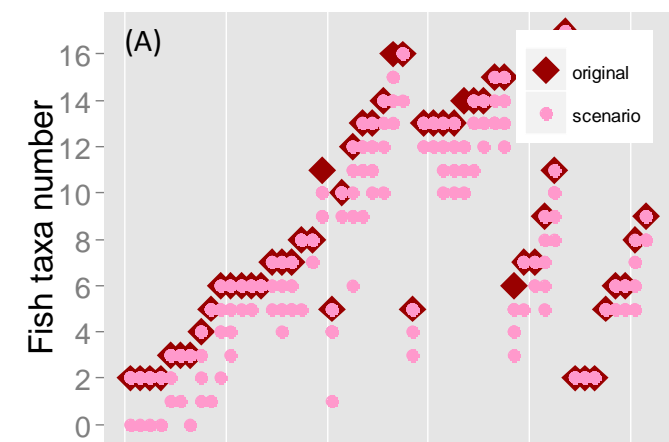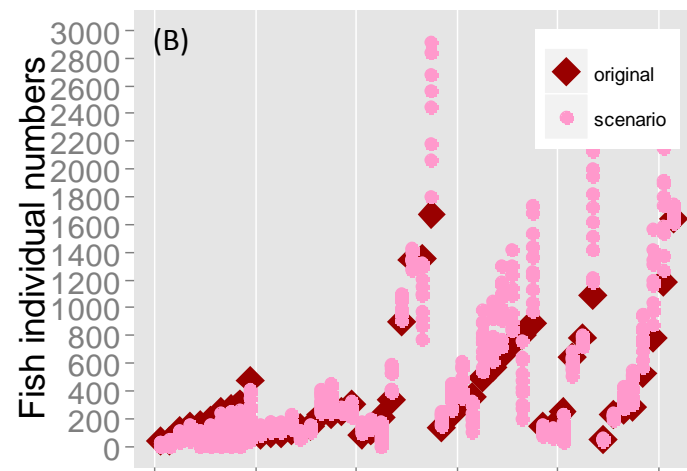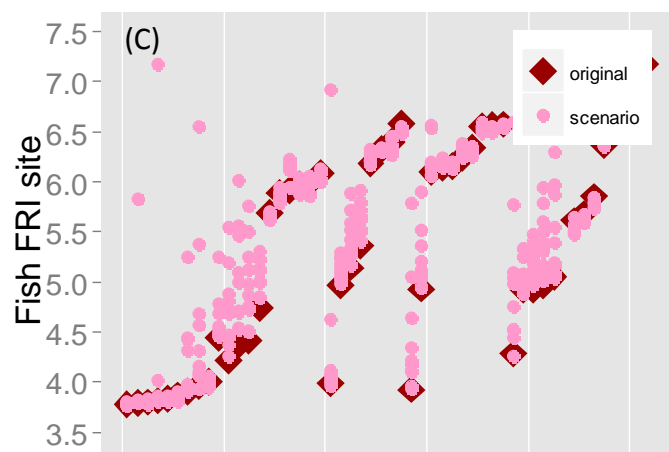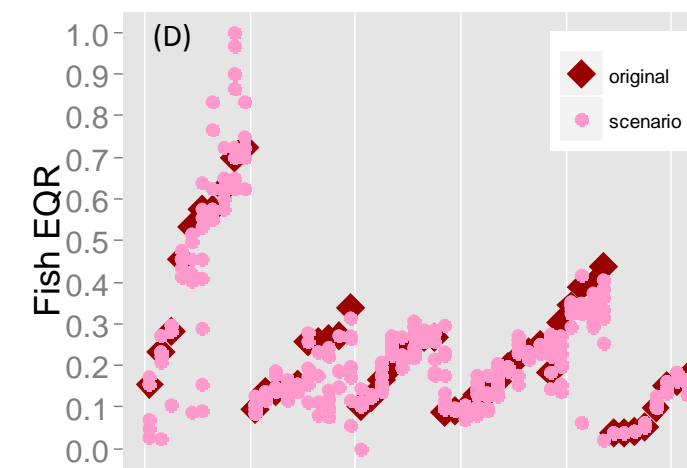

**Figure S2 (A-D).** Changes in values of key metrics for fish communities (taxa number, individuals, FRI, general EQR score) for original and scenario data. Sites are ordered for increasing metric value for each metric, i.e. that point 1 in Figure S2-A is not necessarily the same sampling site as point 1 in Figure S2-B.
