# Supplementary material
Source: MDPI journal article supplement (https://www.mdpi.com/2073-4441/9/4/188)
Supplement: s1 [file s1]

**Table S3.** List of invertebrate taxa in samples analysed and their classification into headwater, river, generalist or n/a-taxa.

Note that this is an unfiltered list and that during the assessment calculation several higher level taxa are automatically ignored. The detailed stream zonation preference of invertebrates is available at <http://www.freshwaterecology.info> following a login.

| Scientific name                                     | Classification |
|-----------------------------------------------------|----------------|
| <i>Adicella filicornis</i>                          | headwater      |
| <i>Agabus paludosus</i>                             | river          |
| <i>Agabus</i> sp.                                   | n/a            |
| <i>Agapetinae</i> Gen. sp.                          | n/a            |
| <i>Agapetus fuscipes</i>                            | headwater      |
| <i>Agapetus ochripes</i>                            | generalist     |
| <i>Allogamus auricollis</i>                         | generalist     |
| <i>Amphinemura</i> sp.                              | n/a            |
| <i>Amphipoda</i> Gen. sp.                           | n/a            |
| <i>Anabolia nervosa</i>                             | river          |
| <i>Anacaena globulus</i>                            | n/a            |
| <i>Anacaena limbata</i>                             | river          |
| <i>Ancylus fluviatilis</i>                          | generalist     |
| <i>Anisus vortex</i>                                | river          |
| <i>Annitella obscurata</i>                          | generalist     |
| <i>Anodonta anatina</i>                             | n/a            |
| <i>Anomalopterygella chauviniana</i>                | generalist     |
| <i>Antocha</i> sp.                                  | n/a            |
| <i>Aphelocheirus aestivalis</i>                     | river          |
| <i>Asellus aquaticus</i>                            | n/a            |
| <i>Atherix ibis</i>                                 | generalist     |
| <i>Athripsodes albifrons</i>                        | generalist     |
| <i>Athripsodes bilineatus bilineatus</i>            | generalist     |
| <i>Athripsodes cinereus</i>                         | n/a            |
| <i>Athripsodes commutatus</i>                       | generalist     |
| <i>Athripsodes</i> sp.                              | n/a            |
| <i>Atrichops crassipes</i>                          | n/a            |
| <i>Baetidae</i> Gen. sp.                            | n/a            |
| <i>Baetis alpinus</i>                               | generalist     |
| <i>Baetis alpinus/lutheri/melanonyx/wardarensis</i> | n/a            |
| <i>Baetis alpinus-Gr.</i>                           | n/a            |
| <i>Baetis buceratus</i>                             | generalist     |
| <i>Baetis fuscatus</i>                              | generalist     |
| <i>Baetis fuscatus/scambus</i>                      | n/a            |
| <i>Baetis lutheri</i>                               | generalist     |
| <i>Baetis muticus</i>                               | generalist     |
| <i>Baetis niger</i>                                 | generalist     |
| <i>Baetis rhodani</i>                               | generalist     |
| <i>Baetis scambus</i>                               | generalist     |
| <i>Baetis</i> sp.                                   | generalist     |
| <i>Baetis wardarensis</i>                           | generalist     |
| <i>Baetis vernus</i>                                | generalist     |
| <i>Beraeodes minutus</i>                            | generalist     |
| <i>Bezzia</i> sp.                                   | n/a            |
| <i>Bithynia leachii</i> ssp.                        | river          |

**Table S3.** List of invertebrate taxa in samples analysed and their classification into headwater, river, generalist or n/a-taxa.

| Scientific name                                | Classification |
|------------------------------------------------|----------------|
| <i>Bithynia tentaculata</i>                    | n/a            |
| <i>Brachycentrus maculatus</i>                 | generalist     |
| <i>Brachycentrus subnubilus</i>                | generalist     |
| <i>Brachyptera risi</i>                        | generalist     |
| <i>Brachyptera seticornis</i>                  | generalist     |
| <i>Brachyptera</i> sp.                         | n/a            |
| <i>Brillia bifida</i>                          | n/a            |
| <i>Bythinella</i> sp.                          | headwater      |
| <i>Caenis beskidensis</i>                      | generalist     |
| <i>Caenis luctuosa</i>                         | n/a            |
| <i>Caenis luctuosa/macrura</i>                 | n/a            |
| <i>Caenis macrura</i>                          | n/a            |
| <i>Caenis rivulorum</i>                        | generalist     |
| <i>Caenis</i> sp.                              | n/a            |
| <i>Calopteryx</i> sp.                          | n/a            |
| <i>Calopteryx splendens</i>                    | river          |
| <i>Calopteryx virgo</i>                        | generalist     |
| <i>Capnia</i> sp.                              | n/a            |
| <i>Centroptilum luteolum</i>                   | n/a            |
| <i>Ceraclea dissimilis</i>                     | generalist     |
| <i>Ceraclea</i> sp.                            | n/a            |
| <i>Ceratopogonidae</i> Gen. sp.                | n/a            |
| <i>Ceratopogoninae</i> Gen. sp.                | n/a            |
| <i>Ceratopogoninae/Palpomyiinae</i> Gen. sp.   | n/a            |
| <i>Chaetopterygini/Stenophylacini</i> Gen. sp. | n/a            |
| <i>Chaetopteryx fusca/villosa</i>              | n/a            |
| <i>Chaetopteryx</i> sp.                        | n/a            |
| <i>Chaetopteryx villosa villosa</i>            | generalist     |
| <i>Chelifera</i> sp.                           | n/a            |
| <i>Cheumatopsyche lepida</i>                   | generalist     |
| <i>Chironomidae</i> Gen. sp.                   | n/a            |
| <i>Chironominae</i> Gen. sp.                   | n/a            |
| <i>Chironomini</i> Gen. sp.                    | n/a            |
| <i>Chironomus</i> sp.                          | n/a            |
| <i>Chloroperla</i> sp.                         | n/a            |
| <i>Chloroperlidae</i> Gen. sp.                 | n/a            |
| <i>Chrysopilus</i> sp.                         | n/a            |
| <i>Clinocera</i> sp.                           | generalist     |
| <i>Clinocerinae</i> Gen. sp.                   | n/a            |
| <i>Cloeon dipterum</i>                         | river          |
| <i>Coenagrionidae</i> Gen. sp.                 | n/a            |
| <i>Cordulegaster boltonii</i>                  | generalist     |
| <i>Corixa dentipes</i>                         | river          |
| <i>Corixidae</i> Gen. sp.                      | n/a            |
| <i>Corixinae</i> Gen. sp.                      | n/a            |
| <i>Corophium curvispinum</i>                   | river          |
| <i>Cyrrus flavidus</i>                         | n/a            |
| <i>Cyrrus trimaculatus</i>                     | generalist     |

**Table S3.** List of invertebrate taxa in samples analysed and their classification into headwater, river, generalist or n/a-taxa.

| Scientific name                               | Classification |
|-----------------------------------------------|----------------|
| Dendrocoelum lacteum                          | n/a            |
| Diamesinae Gen. sp.                           | n/a            |
| Dicranota sp.                                 | generalist     |
| Dicranota (Dicranota) sp.                     | n/a            |
| Dikerogammarus villosus                       | n/a            |
| Dinocras sp.                                  | n/a            |
| Diptera Gen. sp.                              | n/a            |
| Diura bicaudata                               | headwater      |
| Drusus annulatus                              | headwater      |
| Drusus annulatus/biguttatus                   | n/a            |
| Drusus chrysotus                              | headwater      |
| Drusus sp.                                    | n/a            |
| Drusus trifidus                               | headwater      |
| Dryopidae Gen. sp.                            | n/a            |
| Dugesia gonocephala                           | generalist     |
| Dugesia lugubris/polychroa                    | n/a            |
| Dugesia sp.                                   | n/a            |
| Dytiscidae Gen. sp.                           | n/a            |
| Ecclisopteryx dalearlica                      | generalist     |
| Ecclisopteryx madida                          | headwater      |
| Ecclisopteryx sp.                             | generalist     |
| Ecdyonurus dispar                             | generalist     |
| Ecdyonurus sp.                                | n/a            |
| Ecdyonurus torrentis                          | generalist     |
| Ecdyonurus venosus-Gr.                        | generalist     |
| Echinogammarus berilloni                      | n/a            |
| Echinogammarus sp.                            | n/a            |
| Eiseniella tetraedra                          | generalist     |
| Electrogena affinis                           | generalist     |
| Elmidae Gen. sp.                              | n/a            |
| Elmis aenea                                   | generalist     |
| Elmis aenea Ad.                               | generalist     |
| Elmis aenea/maugetii                          | n/a            |
| Elmis aenea/maugetii Ad.                      | n/a            |
| Elmis aenea/maugetii/rietscheli/rioloides     | n/a            |
| Elmis aenea/maugetii/rietscheli/rioloides Ad. | n/a            |
| Elmis latreillei                              | headwater      |
| Elmis maugetii Ad.                            | generalist     |
| Elmis maugetii Lv.                            | generalist     |
| Elmis sp.                                     | generalist     |
| Elmis sp. Ad.                                 | generalist     |
| Elmis sp. Lv.                                 | generalist     |
| Elodes marginata Lv.                          | n/a            |
| Elodes minuta                                 | n/a            |
| Elodes minuta-Gr. Lv.                         | n/a            |
| Elodes sp.                                    | n/a            |
| Eloeophila sp.                                | n/a            |
| Elophila sp.                                  | n/a            |

**Table S3.** List of invertebrate taxa in samples analysed and their classification into headwater, river, generalist or n/a-taxa.

| Scientific name             | Classification |
|-----------------------------|----------------|
| Empididae Gen. sp.          | n/a            |
| Enchytraeidae Gen. sp.      | n/a            |
| Enchytraeus buchholzii      | n/a            |
| Epeorus assimilis           | n/a            |
| Epeorus sp.                 | generalist     |
| Epeorus sylvicola           | generalist     |
| Ephemera danica             | generalist     |
| Ephemera sp.                | n/a            |
| Ephemerella mucronata       | generalist     |
| Ephemerella sp.             | n/a            |
| Ephemerellidae Gen. sp.     | n/a            |
| Erpobdella nigricollis      | river          |
| Erpobdella octoculata       | n/a            |
| Erpobdella sp.              | n/a            |
| Erpobdella vilnensis        | generalist     |
| Erpobdellidae Gen. sp.      | n/a            |
| Esolus angustatus           | generalist     |
| Esolus parallelepipedus Ad. | generalist     |
| Esolus sp.                  | generalist     |
| Esolus sp. Ad.              | generalist     |
| Esolus sp. Lv.              | generalist     |
| Fredericella sultana        | river          |
| Galba truncatula            | n/a            |
| Gammaridae Gen. sp.         | n/a            |
| Gammarus fossarum           | generalist     |
| Gammarus fossarum/pulex     | n/a            |
| Gammarus pulex              | generalist     |
| Gammarus roeselii           | n/a            |
| Gammarus sp.                | n/a            |
| Gammarus tigrinus           | n/a            |
| Gerridae Gen. sp.           | n/a            |
| Gerris lacustris            | river          |
| Gerris sp.                  | n/a            |
| Glossiphonia complanata     | n/a            |
| Glossiphonia nebulosa       | generalist     |
| Glossiphonia sp.            | n/a            |
| Glossiphoniidae Gen. sp.    | n/a            |
| Glossosoma boltoni          | generalist     |
| Glossosoma conformis        | headwater      |
| Glyphotaelius pellucidus    | river          |
| Goera pilosa                | generalist     |
| Goeridae Gen. sp.           | n/a            |
| Gordius aquaticus           | n/a            |
| Gyraulus albus              | n/a            |
| Habroleptoides confusa      | generalist     |
| Habroleptoides sp.          | n/a            |
| Habrophlebia fusca          | n/a            |
| Habrophlebia lauta          | n/a            |

**Table S3.** List of invertebrate taxa in samples analysed and their classification into headwater, river, generalist or n/a-taxa.

| Scientific name                                | Classification |
|------------------------------------------------|----------------|
| Haemopsis sanguisuga                           | n/a            |
| Halesus digitatus digitatus                    | generalist     |
| Halesus digitatus/tesselatus                   | n/a            |
| Halesus radiatus                               | generalist     |
| Halesus sp.                                    | n/a            |
| Halesus tessellatus                            | generalist     |
| Haliphus fluviatilis                           | river          |
| Haliphus lineatocollis                         | n/a            |
| Haliphus sp.                                   | n/a            |
| Haplotaxidae Gen. sp.                          | n/a            |
| Haplotaxis gordioides                          | generalist     |
| Helobdella stagnalis                           | n/a            |
| Helophorus brevipalpis Ad.                     | river          |
| Hemerodromia sp.                               | n/a            |
| Henlea sp.                                     | n/a            |
| Heptagenia sulphurea                           | generalist     |
| Heptageniidae Gen. sp.                         | generalist     |
| Heterotrissocladius marcidus                   | n/a            |
| Hydrachnidia Gen. sp.                          | n/a            |
| Hydraena dentipes                              | generalist     |
| Hydraena gracilis                              | generalist     |
| Hydraena gracilis Ad.                          | generalist     |
| Hydraena riparia                               | n/a            |
| Hydraena riparia Ad.                           | n/a            |
| Hydraena sp.                                   | n/a            |
| Hydraena sp. Ad.                               | n/a            |
| Hydraena testacea Ad.                          | n/a            |
| Hydraena truncata                              | generalist     |
| Hydrocyphon deflexicollis Lv.                  | n/a            |
| Hydroporinae Gen. sp. Lv.                      | n/a            |
| Hydroporus palustris                           | river          |
| Hydropsyche angustipennis angustipennis        | n/a            |
| Hydropsyche botosaneanui/incognita/pellucidula | n/a            |
| Hydropsyche contubernalis ssp.                 | generalist     |
| Hydropsyche dinarica                           | generalist     |
| Hydropsyche fulvipes                           | headwater      |
| Hydropsyche incognita                          | generalist     |
| Hydropsyche incognita/pellucidula              | n/a            |
| Hydropsyche instabilis                         | generalist     |
| Hydropsyche pellucidula                        | generalist     |
| Hydropsyche pellucidula-Gr.                    | n/a            |
| Hydropsyche saxonica                           | headwater      |
| Hydropsyche siltalai                           | generalist     |
| Hydropsyche sp.                                | n/a            |
| Hydroptila sp.                                 | n/a            |
| Ibisia marginata                               | n/a            |
| Ilybius fuliginosus                            | river          |
| Ironoquia dubia                                | n/a            |

**Table S3.** List of invertebrate taxa in samples analysed and their classification into headwater, river, generalist or n/a-taxa.

| Scientific name                          | Classification |
|------------------------------------------|----------------|
| Isoperla grammatica                      | generalist     |
| Isoperla sp.                             | n/a            |
| Laccobius (Laccobius) sp.                | n/a            |
| Lepidostoma basale                       | generalist     |
| Lepidostoma hirtum                       | generalist     |
| Leptoceridae Gen. sp.                    | n/a            |
| Leptocerus interruptus                   | river          |
| Leptophlebia marginata                   | river          |
| Leptophlebiidae Gen. sp.                 | n/a            |
| Leuctra braueri                          | headwater      |
| Leuctra geniculata                       | river          |
| Leuctra nigra                            | n/a            |
| Leuctra sp.                              | generalist     |
| Limnadiidae Gen. sp.                     | n/a            |
| Limnephilidae Gen. sp.                   | n/a            |
| Limnephilinae Gen. sp.                   | n/a            |
| Limnephilini Gen. sp.                    | n/a            |
| Limnephilus binotatus                    | river          |
| Limnephilus germanus                     | river          |
| Limnephilus lunatus                      | river          |
| Limnephilus rhombicus rhombicus          | river          |
| Limnius opacus Ad.                       | generalist     |
| Limnius opacus Lv.                       | generalist     |
| Limnius perrisi                          | generalist     |
| Limnius perrisi Ad.                      | generalist     |
| Limnius perrisi Lv.                      | generalist     |
| Limnius sp.                              | n/a            |
| Limnius sp. Lv.                          | n/a            |
| Limnius volckmari                        | generalist     |
| Limnius volckmari Ad.                    | generalist     |
| Limnius volckmari Lv.                    | generalist     |
| Limnodrilus hoffmeisteri                 | n/a            |
| Limnodrilus sp.                          | n/a            |
| Limoniidae Gen. sp.                      | n/a            |
| Liponeura brevirostris/decipiens/vimmeri | n/a            |
| Liponeura sp.                            | headwater      |
| Lithax niger                             | headwater      |
| Lumbriculidae Gen. sp.                   | n/a            |
| Lumbriculus variegatus                   | n/a            |
| Lymnaea stagnalis                        | river          |
| Lype phaeopa                             | generalist     |
| Lype reducta                             | generalist     |
| Macronychus quadrituberculatus Lv.       | river          |
| Melampophylax mucoreus                   | generalist     |
| Micrasema longulum                       | generalist     |
| Micrasema minimum                        | generalist     |
| Micronecta sp.                           | n/a            |
| Micropsectra notescens-Gr.               | n/a            |

**Table S3.** List of invertebrate taxa in samples analysed and their classification into headwater, river, generalist or n/a-taxa.

| Scientific name                | Classification |
|--------------------------------|----------------|
| Micropsectra sp.               | n/a            |
| Micropterna lateralis/sequax   | n/a            |
| Microtendipes chloris-Gr.      | n/a            |
| Microtendipes sp.              | n/a            |
| Molanna angustata              | river          |
| Mystacides nigra               | n/a            |
| Mystacides sp.                 | n/a            |
| Naididae/Tubificidae Gen. sp.  | n/a            |
| Nematoda Gen. sp.              | n/a            |
| Nemoura cinerea cinerea        | n/a            |
| Nemoura sp.                    | n/a            |
| Nemouridae Gen. sp.            | n/a            |
| Nemurella sp.                  | n/a            |
| Nepa cinerea                   | river          |
| Neureclipsis bimaculata        | river          |
| Notidobia ciliaris             | generalist     |
| Notonecta glauca glauca        | river          |
| Odontocerum albicorne          | headwater      |
| Oecetis furva                  | river          |
| Oecetis notata                 | generalist     |
| Oecismus monedula monedula     | generalist     |
| Oligochaeta Gen. sp.           | n/a            |
| Onychogomphus forcipatus ssp.  | generalist     |
| Onychogomphus sp.              | n/a            |
| Orectochilus villosus          | generalist     |
| Orectochilus villosus Ad.      | generalist     |
| Orectochilus villosus Lv.      | generalist     |
| Oreodytes sanmarkii            | generalist     |
| Oreodytes sanmarkii Ad.        | generalist     |
| Orthocladiinae Gen. sp.        | n/a            |
| Oulimnius sp.                  | n/a            |
| Oulimnius sp. Ad.              | n/a            |
| Oulimnius sp. Lv.              | n/a            |
| Oulimnius tuberculatus         | generalist     |
| Oulimnius tuberculatus Ad.     | generalist     |
| Oulimnius tuberculatus Lv.     | generalist     |
| Paraleptophlebia sp.           | n/a            |
| Paraleptophlebia submarginata  | generalist     |
| Pedicia sp.                    | n/a            |
| Peltodytes caesus              | river          |
| Perla marginata                | generalist     |
| Perlidae Gen. sp.              | n/a            |
| Perlodes sp.                   | n/a            |
| Philopotamus montanus montanus | headwater      |
| Physa fontinalis               | river          |
| Pilaria sp.                    | n/a            |
| Pisidium amnicum               | river          |
| Pisidium casertanum ssp.       | n/a            |

**Table S3.** List of invertebrate taxa in samples analysed and their classification into headwater, river, generalist or n/a-taxa.

| Scientific name                                     | Classification |
|-----------------------------------------------------|----------------|
| <i>Pisidium henslowanum</i>                         | river          |
| <i>Pisidium milium</i>                              | river          |
| <i>Pisidium moitessierianum</i>                     | river          |
| <i>Pisidium</i> sp.                                 | n/a            |
| <i>Pisidium subtruncatum</i>                        | n/a            |
| <i>Pisidium supinum</i>                             | river          |
| <i>Planaria torva</i>                               | river          |
| <i>Planorbidae</i> Gen. sp.                         | n/a            |
| <i>Planorbis carinatus</i>                          | river          |
| <i>Planorbis planorbis</i>                          | river          |
| <i>Platambus maculatus</i>                          | generalist     |
| <i>Platambus maculatus</i> Lv.                      | generalist     |
| <i>Platycnemis pennipes</i>                         | river          |
| <i>Plectrocnemia conspersa conspersa</i>            | generalist     |
| <i>Plectrocnemia</i> sp.                            | n/a            |
| <i>Plumatella fungosa</i>                           | river          |
| <i>Plumatella</i> sp.                               | n/a            |
| <i>Polycelis nigra/tenuis</i>                       | n/a            |
| <i>Polycelis tenuis</i>                             | generalist     |
| <i>Polycentropodidae</i> Gen. sp.                   | n/a            |
| <i>Polycentropus flavomaculatus flavomaculatus</i>  | n/a            |
| <i>Polypedilum albicorne</i>                        | headwater      |
| <i>Polypedilum convictum</i>                        | generalist     |
| <i>Polypedilum pedestre</i>                         | n/a            |
| <i>Polypedilum scalaenum</i>                        | n/a            |
| <i>Polypedilum</i> sp.                              | n/a            |
| <i>Porifera</i> Gen. sp.                            | n/a            |
| <i>Potamanthus luteus</i>                           | river          |
| <i>Potamophylax cingulatus/latipennis/luctuosus</i> | n/a            |
| <i>Potamophylax rotundipennis</i>                   | generalist     |
| <i>Potamophylax</i> sp.                             | n/a            |
| <i>Potamopyrgus antipodarum</i>                     | n/a            |
| <i>Potamothrix hammoniensis</i>                     | n/a            |
| <i>Proasellus coxalis</i>                           | n/a            |
| <i>Procloeon bifidum</i>                            | n/a            |
| <i>Prodiamesa olivacea</i>                          | generalist     |
| <i>Prosimulium</i> sp.                              | generalist     |
| <i>Prosimulium tomosvaryi</i>                       | generalist     |
| <i>Protonemura</i> sp.                              | headwater      |
| <i>Psammoryctides barbatus</i>                      | n/a            |
| <i>Psychodidae</i> Gen. sp.                         | n/a            |
| <i>Psychomyia pusilla</i>                           | generalist     |
| <i>Ptychoptera</i> sp.                              | n/a            |
| <i>Radix auricularia</i>                            | river          |
| <i>Radix balthica</i>                               | generalist     |
| <i>Radix balthica/labiata</i>                       | n/a            |
| <i>Radix</i> sp.                                    | n/a            |
| <i>Rhantus</i> sp. Lv.                              | n/a            |



**Table S3.** List of invertebrate taxa in samples analysed and their classification into headwater, river, generalist or n/a-taxa.

| Scientific name                    | Classification |
|------------------------------------|----------------|
| Rhithrogena picteti                | generalist     |
| Rhithrogena semicolorata-Gr.       | generalist     |
| Rhithrogena sp.                    | generalist     |
| Rhyacodrilus coccineus             | river          |
| Rhyacophila dorsalis/nubila        | n/a            |
| Rhyacophila evoluta                | generalist     |
| Rhyacophila fasciata fasciata      | headwater      |
| Rhyacophila glareosa               | headwater      |
| Rhyacophila intermedia             | headwater      |
| Rhyacophila nubila                 | generalist     |
| Rhyacophila oblitterata            | generalist     |
| Rhyacophila praemorsa              | headwater      |
| Rhyacophila s. str. sp.            | n/a            |
| Rhyacophila sp.                    | n/a            |
| Rhyacophila torrentium             | generalist     |
| Rhyacophila tristis                | generalist     |
| Rhyacophila vulgaris               | headwater      |
| Rhyacophila vulgaris-Gr.           | n/a            |
| Rhyacophila (Hyperrhyacophila) sp. | n/a            |
| Rhyacophila (Rhyacophila) sp.      | n/a            |
| Rhynchelmis limosella              | n/a            |
| Riolus sp.                         | n/a            |
| Riolus sp. Lv.                     | n/a            |
| Sericostoma flavicorne/personatum  | n/a            |
| Sericostoma personatum             | headwater      |
| Sericostoma sp.                    | n/a            |
| Serratella ignita                  | generalist     |
| Sialis fuliginosa                  | generalist     |
| Sialis lutaria                     | n/a            |
| Sialis sp.                         | n/a            |
| Sigara falleni                     | river          |
| Sigara striata                     | river          |
| Silo nigricornis                   | generalist     |
| Silo nigricornis/piceus            | n/a            |
| Silo pallipes                      | generalist     |
| Silo piceus                        | generalist     |
| Silo sp.                           | n/a            |
| Simulium angustitarse              | generalist     |
| Simulium cryophilum                | generalist     |
| Simulium lundstromi                | generalist     |
| Simulium ornatum                   | generalist     |
| Simulium ornatum-Gr.               | n/a            |
| Simulium sp.                       | n/a            |
| Simulium (Simulium) sp.            | generalist     |
| Simulium (Wilhelmia) sp.           | n/a            |
| Siphonurus aestivalis              | river          |
| Siphonoperla sp.                   | n/a            |
| Siphonoperla torrentium torrentium | generalist     |

**Table S3.** List of invertebrate taxa in samples analysed and their classification into headwater, river, generalist or n/a-taxa.

| Scientific name               | Classification |
|-------------------------------|----------------|
| Sisyra sp.                    | n/a            |
| Sphaerium corneum             | n/a            |
| Sphaerium ovale               | n/a            |
| Sphaerium sp.                 | n/a            |
| Stenelmis canaliculata        | generalist     |
| Stenelmis canaliculata Ad.    | generalist     |
| Stenelmis canaliculata Lv.    | generalist     |
| Stenelmis sp. Lv.             | n/a            |
| Stenophylacini Gen. sp.       | n/a            |
| Stictotarsus sp. Lv.          | n/a            |
| Stratiomyiidae Gen. sp.       | n/a            |
| Stylaria lacustris            | n/a            |
| Stylodrilus heringianus       | generalist     |
| Tabanidae Gen. sp.            | n/a            |
| Tanypodinae Gen. sp.          | n/a            |
| Tanytarsini Gen. sp.          | n/a            |
| Theromyzon tessulatum         | river          |
| Tinodes pallidulus            | headwater      |
| Tinodes rostocki              | generalist     |
| Tinodes sp.                   | n/a            |
| Tinodes waeneri ssp.          | river          |
| Tipula sp.                    | n/a            |
| Tipulidae Gen. sp.            | n/a            |
| Torleya major                 | generalist     |
| Trichoptera Gen. sp.          | n/a            |
| Trochetinae Gen. sp.          | n/a            |
| Tubifex tubifex               | n/a            |
| Tubificidae Gen. sp.          | n/a            |
| Tubificidae juv with setae    | n/a            |
| Turbellaria Gen. sp.          | n/a            |
| Tvetenia sp.                  | n/a            |
| Unio pictorum ssp.            | n/a            |
| Unio tumidus tumidus          | river          |
| Valvata piscinalis piscinalis | n/a            |
| Valvata piscinalis ssp.       | n/a            |
| Velia sp.                     | n/a            |
| Viviparus viviparus           | n/a            |
| Zygoptera Gen. sp.            | n/a            |
