# Supplementary material
Source: MDPI journal article supplement (https://www.mdpi.com/2073-4441/9/4/188)
Supplement: s1 [file s1]

Use an expert-derived ruleset to estimate potential climate-change effects on river and stream assessment results for benthic invertebrates and fish.

```
#----- Set path and read data -----
path <- "...
setwd(path)
data <- read.csv("example_taxa_list.csv", header=TRUE)

#----- Define variables -----
# Set number of individuals of various species found at various sites and scenarios
# describing how the potential abundances might change.

# Set variables:
# ID_ART: taxa ID
# S1, S2, ..., S10 - scenarios: list of abundance multipliers for each taxa
# abundance_site_1, abundance_site_2, ...: taxa abundances found at each site

nScenarios <- 10
nSites <- 2
nSpecies <- nrow(data)
abundances <- subset(data, select=c(abundance_site_1, abundance_site_2))

#----- Define scenario function -----
implementScenario<-function(scenario, scenario_name) {
  newSample <- array(NA, dim=c(nSpecies,nSites+1)) # create empty array
  newSample[,1] <- ID_ART # copy taxon ID
  # Loop over number of taxa and number of sites
  for (i in 1:nSpecies)
    for (j in 1:nSites)
    {
      lambda <- scenario[i]*abundances[i,j] # multiply abundance by scenario value
      newSample[i,j+1] <- rpois(1,lambda) # simulate stochasticity
    }
  # Add column names and save results to disk
  colnames(newSample) <- c("ID_ART", "new_abundance_site_1", "new_abundance_site_2")
  write.csv(newSample,file=paste(scenario_name,"sample.csv"), row.names=FALSE)
}

#----- Run scenarios -----
implementScenario(S1,"S1")
implementScenario(S2,"S2")
implementScenario(S3,"S3")
implementScenario(S4,"S4")
implementScenario(S5,"S5")
implementScenario(S6,"S6")
implementScenario(S7,"S7")
implementScenario(S8,"S8")
implementScenario(S9,"S9")
implementScenario(S10,"S10")
```

```
#----- End & clean up -----  
cat("end \n")  
detach(data)
```
