# Supplementary material
Source: MDPI journal article supplement (https://www.mdpi.com/2073-4441/9/4/188)
Supplement: s1 [file s1]

**Table S1.** List of z-test results for 4 invertebrate metrics for different stream types; estimated mean ratios and P-value indicating a difference from mu=1; P values <= 0.05 are highlighted; S refers to severity multiplier.

| Stream type         | S  | Taxa number |       | Abundance  |       | EPT (%)    |       | General degradation |       |
|---------------------|----|-------------|-------|------------|-------|------------|-------|---------------------|-------|
|                     |    | mean ratio  | P     | mean ratio | P     | mean ratio | P     | mean ratio          | P     |
| Mountain_small_good | 1  | 0.97        | 0.072 | 1.01       | 0.278 | 1.00       | 0.517 | 0.99                | 0.153 |
|                     | 2  | 0.97        | 0.043 | 1.04       | 0.001 | 1.00       | 0.285 | 1.00                | 0.939 |
|                     | 3  | 0.97        | 0.064 | 1.08       | 0.000 | 1.00       | 0.774 | 0.99                | 0.000 |
|                     | 4  | 0.97        | 0.035 | 1.08       | 0.000 | 1.00       | 0.505 | 0.99                | 0.047 |
|                     | 5  | 0.97        | 0.016 | 1.13       | 0.000 | 0.99       | 0.250 | 0.98                | 0.000 |
|                     | 6  | 0.98        | 0.012 | 1.13       | 0.000 | 0.99       | 0.590 | 0.98                | 0.000 |
|                     | 7  | 0.96        | 0.011 | 1.17       | 0.000 | 0.98       | 0.013 | 0.98                | 0.000 |
|                     | 8  | 0.96        | 0.002 | 1.20       | 0.000 | 0.98       | 0.047 | 0.97                | 0.000 |
|                     | 9  | 0.94        | 0.001 | 1.23       | 0.000 | 0.98       | 0.011 | 0.96                | 0.000 |
|                     | 10 | 0.89        | 0.000 | 1.26       | 0.000 | 0.97       | 0.016 | 0.95                | 0.000 |
| Mountain_small_poor | 1  | 0.88        | 0.001 | 1.02       | 0.106 | 0.98       | 0.337 | 0.99                | 0.752 |
|                     | 2  | 0.88        | 0.000 | 1.07       | 0.000 | 0.98       | 0.297 | 0.97                | 0.229 |
|                     | 3  | 0.88        | 0.000 | 1.07       | 0.004 | 0.98       | 0.475 | 0.99                | 0.728 |
|                     | 4  | 0.91        | 0.008 | 1.08       | 0.000 | 1.01       | 0.335 | 0.99                | 0.823 |
|                     | 5  | 0.90        | 0.000 | 1.12       | 0.000 | 1.01       | 0.756 | 0.98                | 0.607 |
|                     | 6  | 0.91        | 0.001 | 1.15       | 0.000 | 0.99       | 0.326 | 0.98                | 0.516 |
|                     | 7  | 0.92        | 0.000 | 1.15       | 0.000 | 0.96       | 0.118 | 0.96                | 0.092 |
|                     | 8  | 0.92        | 0.000 | 1.17       | 0.000 | 1.01       | 0.742 | 1.04                | 0.102 |
|                     | 9  | 0.89        | 0.000 | 1.19       | 0.000 | 0.99       | 0.375 | 1.00                | 0.925 |
|                     | 10 | 0.90        | 0.000 | 1.21       | 0.000 | 0.99       | 0.635 | 0.97                | 0.521 |
| Mountain_large_good | 1  | 0.97        | 0.003 | 1.02       | 0.001 | 1.01       | 0.391 | 0.99                | 0.191 |
|                     | 2  | 0.99        | 0.018 | 1.05       | 0.000 | 1.00       | 0.998 | 1.00                | 0.435 |
|                     | 3  | 0.99        | 0.138 | 1.05       | 0.000 | 1.00       | 0.742 | 1.00                | 0.445 |
|                     | 4  | 0.99        | 0.035 | 1.08       | 0.000 | 1.01       | 0.499 | 1.01                | 0.137 |
|                     | 5  | 0.98        | 0.016 | 1.10       | 0.000 | 1.01       | 0.219 | 1.02                | 0.026 |
|                     | 6  | 0.99        | 0.019 | 1.12       | 0.000 | 1.01       | 0.431 | 1.01                | 0.224 |
|                     | 7  | 0.98        | 0.030 | 1.14       | 0.000 | 1.02       | 0.041 | 1.02                | 0.037 |
|                     | 8  | 0.98        | 0.027 | 1.16       | 0.000 | 1.03       | 0.041 | 1.02                | 0.002 |
|                     | 9  | 0.98        | 0.079 | 1.18       | 0.000 | 1.01       | 0.193 | 1.01                | 0.113 |
|                     | 10 | 0.97        | 0.000 | 1.20       | 0.000 | 1.01       | 0.329 | 1.02                | 0.232 |
| Mountain_large_poor | 1  | 0.92        | 0.001 | 1.03       | 0.001 | 0.98       | 0.244 | 0.94                | 0.106 |
|                     | 2  | 0.94        | 0.003 | 1.02       | 0.073 | 1.00       | 0.810 | 0.96                | 0.139 |
|                     | 3  | 0.94        | 0.000 | 1.05       | 0.000 | 1.02       | 0.119 | 0.98                | 0.346 |
|                     | 4  | 0.94        | 0.001 | 1.07       | 0.000 | 1.02       | 0.196 | 1.01                | 0.750 |
|                     | 5  | 0.93        | 0.002 | 1.08       | 0.001 | 1.03       | 0.215 | 1.01                | 0.826 |
|                     | 6  | 0.96        | 0.000 | 1.10       | 0.000 | 1.04       | 0.009 | 1.09                | 0.003 |
|                     | 7  | 0.96        | 0.002 | 1.12       | 0.000 | 1.06       | 0.000 | 1.06                | 0.024 |
|                     | 8  | 0.95        | 0.003 | 1.13       | 0.000 | 1.04       | 0.007 | 1.04                | 0.066 |
|                     | 9  | 0.97        | 0.000 | 1.18       | 0.000 | 1.04       | 0.017 | 1.08                | 0.061 |
|                     | 10 | 0.95        | 0.000 | 1.18       | 0.000 | 1.03       | 0.137 | 1.06                | 0.059 |
| Lowland_small_good  | 1  | 0.86        | 0.001 | 1.01       | 0.878 | 1.01       | 0.842 | 0.99                | 0.697 |
|                     | 2  | 0.91        | 0.004 | 1.12       | 0.020 | 0.99       | 0.838 | 0.99                | 0.530 |
|                     | 3  | 0.85        | 0.000 | 1.10       | 0.000 | 0.91       | 0.394 | 0.97                | 0.229 |
|                     | 4  | 0.86        | 0.001 | 1.15       | 0.000 | 1.03       | 0.472 | 1.02                | 0.309 |
|                     | 5  | 0.83        | 0.000 | 1.15       | 0.000 | 0.93       | 0.547 | 1.01                | 0.405 |
|                     | 6  | 0.86        | 0.000 | 1.19       | 0.000 | 0.92       | 0.462 | 1.02                | 0.341 |
|                     | 7  | 0.84        | 0.000 | 1.23       | 0.000 | 0.93       | 0.526 | 1.00                | 0.968 |
|                     | 8  | 0.86        | 0.001 | 1.28       | 0.000 | 1.05       | 0.154 | 1.00                | 0.823 |
|                     | 9  | 0.84        | 0.000 | 1.33       | 0.000 | 1.00       | 0.949 | 1.00                | 0.915 |
|                     | 10 | 0.85        | 0.000 | 1.34       | 0.000 | 1.02       | 0.531 | 0.96                | 0.020 |
| Lowland_small_poor  | 1  | 0.90        | 0.003 | 1.06       | 0.364 | 1.01       | 0.813 | 1.00                | 0.879 |
|                     | 2  | 0.83        | 0.013 | 0.97       | 0.335 | 0.86       | 0.179 | 0.99                | 0.866 |
|                     | 3  | 0.93        | 0.035 | 1.07       | 0.008 | 1.01       | 0.648 | 0.93                | 0.143 |
|                     | 4  | 0.83        | 0.071 | 0.97       | 0.794 | 0.92       | 0.474 | 0.87                | 0.191 |
|                     | 5  | 0.91        | 0.008 | 1.16       | 0.007 | 0.98       | 0.218 | 0.96                | 0.342 |
|                     | 6  | 0.91        | 0.008 | 1.09       | 0.009 | 1.03       | 0.631 | 1.04                | 0.618 |
|                     | 7  | 0.89        | 0.009 | 1.17       | 0.000 | 1.03       | 0.546 | 0.97                | 0.647 |
|                     | 8  | 0.91        | 0.013 | 1.13       | 0.001 | 0.95       | 0.082 | 0.94                | 0.006 |
|                     | 9  | 0.87        | 0.052 | 1.11       | 0.174 | 1.00       | 0.969 | 1.04                | 0.531 |
|                     | 10 | 0.94        | 0.001 | 1.31       | 0.002 | 1.05       | 0.579 | 0.96                | 0.345 |

**Table S2.** List of z-test results for 4 fish metrics for different stream types; estimated mean ratios and P-value indicating a difference from mu=1; P values <= 0.05 are highlighted; S refers to severity multiplier.

| Stream type         | S  | Taxa number |       | Individual number |       | FRI        |       | EQR        |       |
|---------------------|----|-------------|-------|-------------------|-------|------------|-------|------------|-------|
|                     |    | mean ratio  | P     | mean ratio        | P     | mean ratio | P     | mean ratio | P     |
| Mountain_small_good | 1  | 1.00        | NaN   | 0.91              | 0.016 | 1.00       | 0.059 | 0.97       | 0.082 |
|                     | 2  | 1.00        | NaN   | 0.81              | 0.000 | 1.00       | 0.349 | 0.99       | 0.067 |
|                     | 3  | 1.00        | NaN   | 0.72              | 0.000 | 1.01       | 0.071 | 1.04       | 0.055 |
|                     | 4  | 0.94        | 0.139 | 0.61              | 0.000 | 1.00       | 0.254 | 0.97       | 0.284 |
|                     | 5  | 0.93        | 0.062 | 0.52              | 0.000 | 1.00       | 0.369 | 1.00       | 0.947 |
|                     | 6  | 0.98        | 0.317 | 0.41              | 0.000 | 1.01       | 0.222 | 1.04       | 0.429 |
|                     | 7  | 0.98        | 0.317 | 0.33              | 0.000 | 1.03       | 0.145 | 0.96       | 0.702 |
|                     | 8  | 0.94        | 0.139 | 0.27              | 0.000 | 1.04       | 0.058 | 0.92       | 0.377 |
|                     | 9  | 0.92        | 0.143 | 0.17              | 0.000 | 1.06       | 0.080 | 0.92       | 0.512 |
|                     | 10 | 0.14        | 0.000 | 0.06              | 0.000 | 0.76       | 0.354 | 0.10       | 0.000 |
| Mountain_small_poor | 1  | 0.92        | 0.009 | 1.04              | 0.185 | 1.01       | 0.022 | 0.97       | 0.618 |
|                     | 2  | 0.93        | 0.004 | 1.06              | 0.254 | 1.02       | 0.007 | 0.94       | 0.385 |
|                     | 3  | 0.89        | 0.000 | 1.11              | 0.041 | 1.03       | 0.001 | 0.83       | 0.001 |
|                     | 4  | 0.91        | 0.006 | 1.20              | 0.023 | 1.03       | 0.007 | 0.84       | 0.055 |
|                     | 5  | 0.95        | 0.083 | 1.23              | 0.029 | 1.04       | 0.041 | 0.88       | 0.126 |
|                     | 6  | 0.95        | 0.093 | 1.25              | 0.029 | 1.05       | 0.019 | 0.80       | 0.004 |
|                     | 7  | 0.96        | 0.059 | 1.26              | 0.038 | 1.05       | 0.029 | 0.79       | 0.009 |
|                     | 8  | 0.95        | 0.017 | 1.31              | 0.059 | 1.07       | 0.022 | 0.79       | 0.022 |
|                     | 9  | 0.94        | 0.064 | 1.37              | 0.043 | 1.09       | 0.018 | 0.79       | 0.038 |
|                     | 10 | 0.82        | 0.004 | 1.44              | 0.026 | 1.11       | 0.020 | 0.74       | 0.045 |
| Mountain_large_good | 1  | 0.95        | 0.035 | 1.04              | 0.302 | 1.00       | 0.767 | 1.04       | 0.161 |
|                     | 2  | 0.96        | 0.092 | 1.10              | 0.172 | 1.00       | 0.834 | 1.07       | 0.099 |
|                     | 3  | 0.95        | 0.012 | 1.08              | 0.262 | 1.01       | 0.063 | 1.06       | 0.285 |
|                     | 4  | 0.93        | 0.023 | 1.10              | 0.367 | 1.01       | 0.050 | 1.04       | 0.508 |
|                     | 5  | 0.94        | 0.010 | 1.18              | 0.195 | 1.01       | 0.072 | 1.02       | 0.609 |
|                     | 6  | 0.98        | 0.140 | 1.23              | 0.161 | 1.02       | 0.010 | 1.04       | 0.520 |
|                     | 7  | 0.89        | 0.000 | 1.19              | 0.273 | 1.03       | 0.029 | 0.99       | 0.892 |
|                     | 8  | 0.89        | 0.003 | 1.30              | 0.158 | 1.03       | 0.015 | 1.00       | 0.942 |
|                     | 9  | 0.91        | 0.008 | 1.30              | 0.205 | 1.05       | 0.025 | 1.05       | 0.526 |
|                     | 10 | 0.72        | 0.003 | 1.28              | 0.262 | 1.13       | 0.140 | 0.87       | 0.371 |
| Mountain_large_poor | 1  | 0.93        | 0.000 | 1.06              | 0.019 | 1.00       | 0.104 | 0.99       | 0.866 |
|                     | 2  | 0.91        | 0.000 | 1.10              | 0.026 | 1.00       | 0.167 | 1.01       | 0.741 |
|                     | 3  | 0.96        | 0.023 | 1.15              | 0.043 | 1.01       | 0.328 | 1.07       | 0.239 |
|                     | 4  | 0.92        | 0.000 | 1.25              | 0.005 | 1.01       | 0.097 | 1.00       | 0.968 |
|                     | 5  | 0.92        | 0.004 | 1.31              | 0.011 | 1.01       | 0.128 | 1.00       | 0.971 |
|                     | 6  | 0.95        | 0.001 | 1.36              | 0.010 | 1.01       | 0.150 | 1.08       | 0.179 |
|                     | 7  | 0.95        | 0.019 | 1.43              | 0.006 | 1.02       | 0.093 | 1.09       | 0.412 |
|                     | 8  | 0.94        | 0.025 | 1.48              | 0.009 | 1.03       | 0.127 | 1.17       | 0.305 |
|                     | 9  | 0.91        | 0.009 | 1.53              | 0.006 | 1.05       | 0.094 | 1.21       | 0.413 |
|                     | 10 | 0.85        | 0.000 | 1.59              | 0.007 | 1.08       | 0.125 | 1.11       | 0.559 |
| Lowland_small_good  | 1  | 0.96        | 0.137 | 1.01              | 0.833 | 1.00       | 0.225 | 0.94       | 0.182 |
|                     | 2  | 0.85        | 0.000 | 0.92              | 0.213 | 1.01       | 0.152 | 0.90       | 0.001 |
|                     | 3  | 0.87        | 0.017 | 0.91              | 0.353 | 1.02       | 0.001 | 0.87       | 0.211 |
|                     | 4  | 0.93        | 0.034 | 0.91              | 0.426 | 1.04       | 0.002 | 0.91       | 0.242 |
|                     | 5  | 0.90        | 0.071 | 0.87              | 0.351 | 1.04       | 0.013 | 0.93       | 0.588 |
|                     | 6  | 0.85        | 0.001 | 0.88              | 0.451 | 1.07       | 0.003 | 0.87       | 0.201 |
|                     | 7  | 0.87        | 0.017 | 0.86              | 0.450 | 1.08       | 0.001 | 0.92       | 0.445 |
|                     | 8  | 0.90        | 0.006 | 0.83              | 0.444 | 1.11       | 0.000 | 0.90       | 0.456 |
|                     | 9  | 0.93        | 0.060 | 0.83              | 0.449 | 1.15       | 0.003 | 0.87       | 0.320 |
|                     | 10 | 0.73        | 0.000 | 0.78              | 0.404 | 1.25       | 0.002 | 0.67       | 0.080 |
| Lowland_small_poor  | 1  | 0.93        | 0.058 | 1.06              | 0.007 | 1.00       | 0.930 | 0.99       | 0.764 |
|                     | 2  | 0.95        | 0.045 | 1.15              | 0.000 | 1.00       | 0.508 | 1.00       | 0.891 |
|                     | 3  | 0.97        | 0.128 | 1.20              | 0.000 | 1.00       | 0.074 | 1.03       | 0.413 |
|                     | 4  | 0.91        | 0.014 | 1.17              | 0.016 | 0.99       | 0.025 | 0.99       | 0.835 |
|                     | 5  | 0.98        | 0.317 | 1.28              | 0.001 | 0.99       | 0.025 | 1.01       | 0.624 |
|                     | 6  | 1.00        | NaN   | 1.29              | 0.003 | 0.99       | 0.008 | 1.00       | 0.909 |
|                     | 7  | 0.95        | 0.137 | 1.38              | 0.002 | 0.99       | 0.013 | 1.02       | 0.465 |
|                     | 8  | 0.95        | 0.317 | 1.39              | 0.002 | 0.99       | 0.009 | 1.02       | 0.374 |
|                     | 9  | 0.93        | 0.163 | 1.47              | 0.001 | 0.99       | 0.011 | 1.03       | 0.479 |
|                     | 10 | 0.93        | 0.058 | 1.55              | 0.000 | 0.99       | 0.015 | 1.00       | 0.859 |
